# Supplementary material for: NRF3-POMP-20S Proteasome Assembly Axis Promotes Cancer Development via Ubiquitin-Independent Proteolysis of p53 and Retinoblastoma Protein
Source: PubMed Central journal article supplement (PMC7189095; doi:10.1128/mcb.00597-19), 2020-04-28
Supplement: MCB.00597-19-s0001.pdf [file MCB.00597-19-s0001.pdf]

1 **Supplementary Figure 1.** *NRF* hotspot mutation and *POMP* expression levels in cancers (A)  
2 Lollipop plots of mutations in *NRF2* (top) and *NRF3* (bottom). Somatic mutation data from  
3 TCGA PanCancer Atlas studies, including 33 tumor types (10976 samples), were analyzed at the  
4 cBioPortal for Cancer Genomics (<http://cbioportal.org>). (B) Dot plots showing *POMP* gene  
5 expression across multiple cancer types and paired normal samples. Red and green dots represent  
6 RNA sequencing expression values of patient-matched tumors and adjacent normal tissue  
7 archived at TCGA and GTEx database. Red and blue abbreviations at the upper part of each graph  
8 indicate a cancer type with significantly higher and lower expression levels of each *NRF* gene  
9 compared to normal samples, respectively (TPM, transcripts per millions; ANOVA, q value  
10 cutoff = 0.01). Abbreviations of cancer types were summarized with the numbers of specimens  
11 in Supplementary Table 1.

12  
13 **Supplementary Figure 2.** NRF3 induces *POMP* gene expression and enhances 20S proteasome  
14 activity. (A) Endogenous NRF3 protein levels in HCT116 (colorectal carcinoma), H1299 (non-  
15 small cell lung cancer), LNCaP (prostate adenocarcinoma), A-172 (glioblastoma), T98G  
16 (glioblastoma multiforme), U2OS (bone osteosarcoma) and HeLa (cervical adenocarcinoma) cell  
17 lines. Endogenous NRF3 protein levels were detected by immunoblotting. (B) Generation of  
18 NRF3 knockdown or overexpression cells using HCT116 or H1299 cells. NRF3 and *POMP*  
19 protein levels were detected by immunoblotting. GFP was used as control. (C) NRF3 protein  
20 levels in nucleus of H1299-oeNRF3#2 or oeGFP#2 cells. Each cell line was fractionated into the  
21 cytoplasmic (C) and nuclear extracts (N), followed by immunoblotting. Whole cell extracts were  
22 used as input samples. (D) Impact of SDS or ATP on proteasome activity. HCT116 cell extracts  
23 were fractionated into 20 fractions, using a 10%–40% glycerol gradient centrifugation, and  
24 assayed for Suc-LLVY-AMC (chymotrypsin-like) hydrolysing activity of 20S proteasomes  
25 (+SDS/–ATP, black) or 26S proteasomes (–SDS/+ATP, gray). (*N* = 1) (E) Impact of a  
26 proteasome inhibitor MG-132 or a protease inhibitor cocktail (PIC) on protease or proteasome  
27 activity. HCT116 cell extracts were fractionated into 20 fractions, using a 10%–40% glycerol  
28 gradient centrifugation, and assayed for Suc-LLVY-AMC (chymotrypsin-like) hydrolysing

29 activity under treatment with 1 × PIC (red) (Nacalai Tesque) or 10 μM MG-132 (blue) (Peptide  
30 Institute) in the presence of SDS and the absence of ATP. (N=1) (F) **Impact of NRF3**  
31 **overexpression** on three types of 20S proteasome activity. The indicated H1299 cell extracts used  
32 in Fig. 1D were assayed for Z-GGL-AMC (chymotrypsin-like), Ac-RLR-AMC (trypsin-like), and  
33 Z-LLE-AMC (caspase-like) hydrolysing activity of 20S proteasomes (+SDS/-ATP). Mean and  
34 individual values are represented as lines and marks, respectively (N = 2). The activity in fractions  
35 #1–#5 was derived from non-proteasomal proteases. (G) **Impact of NRF3 overexpression** on  
36 mRNA levels of four ATP-independent regulatory complex subunits. mRNA levels of indicated  
37 genes in H1299-oeNRF3#2 or oeGFP#2 cells were represented as red or blue bars, respectively.  
38 H1299-GFP#2 cells were used as controls. \**p* < 0.05; n.s., not significant (N = 3, mean ± SD, *t*-  
39 tests) (H) **Impact of NRF3 overexpression on mRNA levels of four 20S proteasome assembly**  
40 **chaperones PSMG1–4. Each PSMG mRNA levels H1299-oeNRF3#2 or oeGFP#2 cells were**  
41 **represented as red or blue bars, respectively. H1299-GFP#2 cells were used as controls.** \**p* < 0.05  
42 (N = 3, mean ± SD, ANOVA followed by Tukey test)

43

44 **Supplementary Figure 3. Impact of NRF3 knockdown** in HCT116 p53KO cells on cell fate,  
45 POMP expression, proteasome activity and drug resistance. (A) **Impact of NRF3 knockdown** on  
46 Rb and p53 protein levels. HCT116 cells were transfected with indicated siRNA. After 2 d, Rb  
47 and p53 proteins were detected by immunostaining. HCT116 p53KO cells were used as controls.  
48 Scale bar, 10 μm. (A and B) Representative contour plots of cell-cycle assay in Fig. 4F (A) and  
49 cell-cycle assay in Fig. 4G (B). (C) Generation of NRF3 knockdown cells using HCT116 p53KO  
50 cells. NRF3 and POMP proteins were detected by immunoblotting. (D) **Impact of NRF3**  
51 **knockdown** on mRNA levels of *POMP* in HCT116 p53KO cells. *POMP* mRNA levels were  
52 assessed by RT-qPCR. \**p* < 0.05 (N = 3, mean ± SD, ANOVA followed by Tukey test) (E) **Impact**  
53 **of NRF3 knockdown** on proteasome activity in HCT116 p53KO cells. The indicated cell extracts  
54 were fractionated into 20 fractions, using a 10%–40% glycerol gradient centrifugation, and  
55 assayed for Suc-LLVY-AMC (chymotrypsin-like) hydrolysing activity of 20S proteasomes  
56 (+SDS/-ATP, top) or 26S proteasomes (-SDS/+ATP, bottom). Mean and individual values are

57 represented as lines and marks, respectively ( $N = 2$ ). The activity in fractions #1–#5 was derived  
58 from non-proteasomal proteases. (F) Impact of NRF3 knockdown on the ubiquitin-independent  
59 degradation of Rb and p53 proteins in HCT116 p53KO cells. Each protein was detected by  
60 immunoblotting after 24 h of treatment with 10  $\mu$ M TKA-243, a ubiquitin activating enzyme E1  
61 inhibitor. DMSO was used as the control. (G) Impact of NRF3 knockdown on mRNA levels of  
62 *Rb* in HCT116 p53KO cells. *Rb* mRNA levels were assessed by RT-qPCR.  $*p < 0.05$  ( $N = 3$ ,  
63 mean  $\pm$  SD, ANOVA followed by Tukey test) (H) Impact of NRF3 knockdown on the resistance  
64 to proteasome inhibitor anticancer agents of HCT116 p53KO cells (left) or HCT116 cells (right).  
65 Viabilities of indicated cells were assessed by WST-1 assays after 24 h of treatment with the  
66 indicated concentration of BTZ (top) or TAK-243 (bottom) ( $N = 3$ , mean  $\pm$  SD).

# Waku et al., Revised Supplementary Figure 1

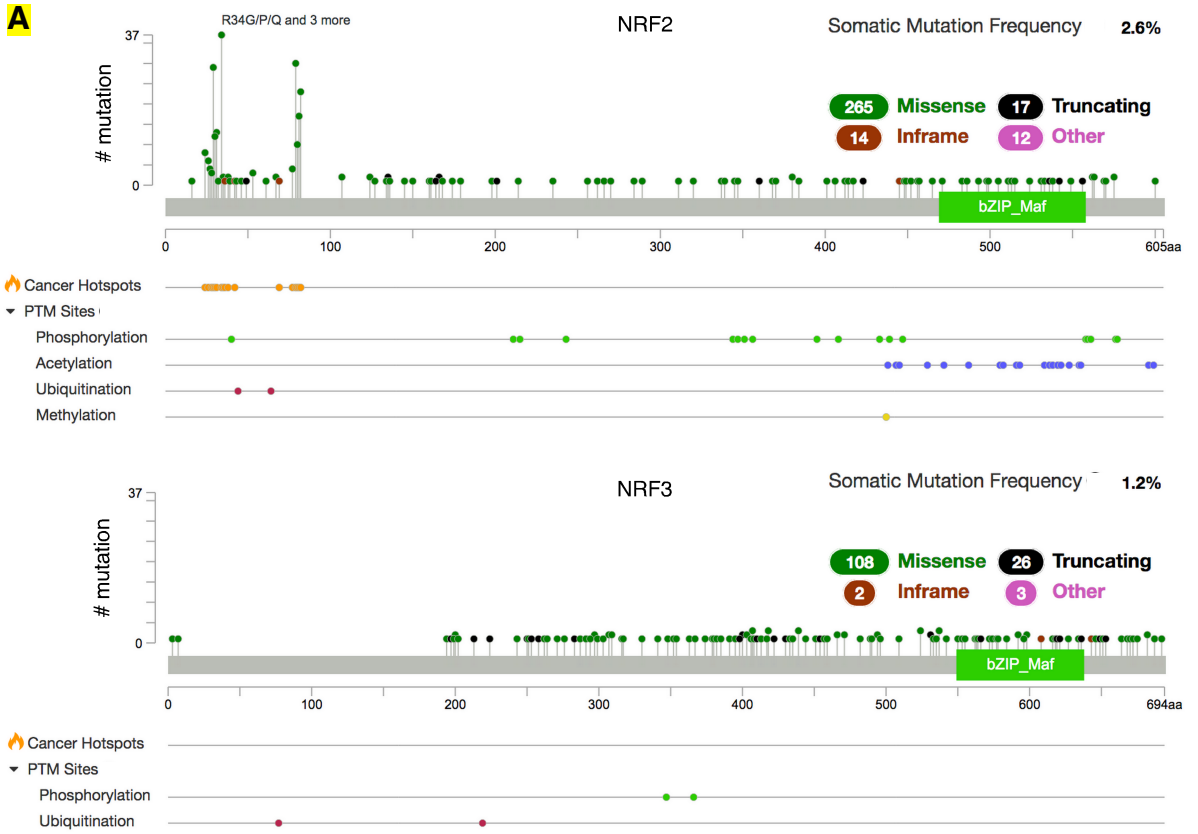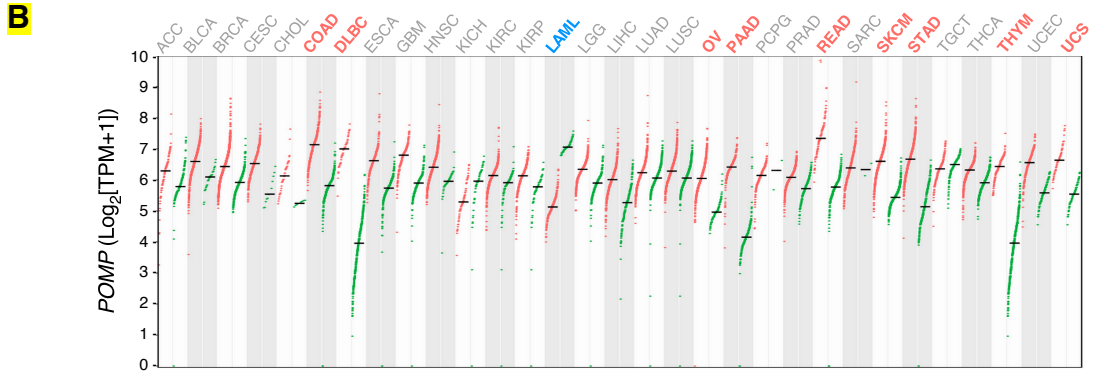



# Waku et al., Revised Supplementary Figure 2

**A**

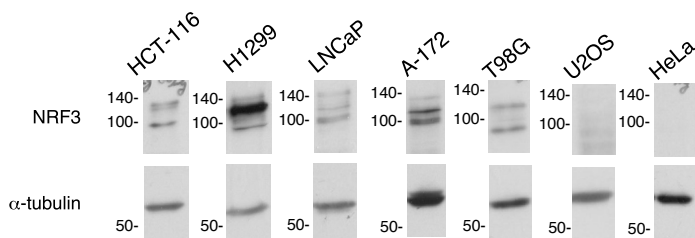

**B**

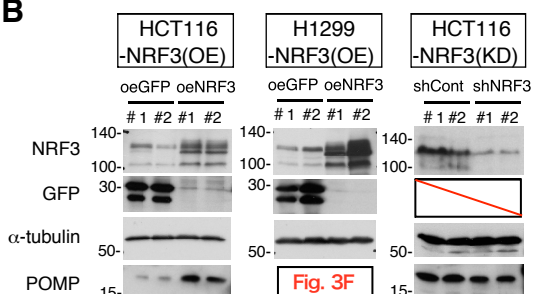

**C**

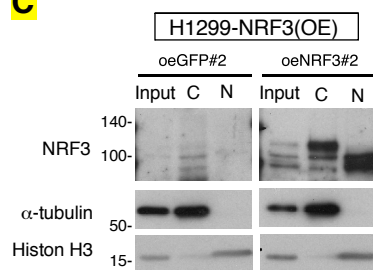

**D**

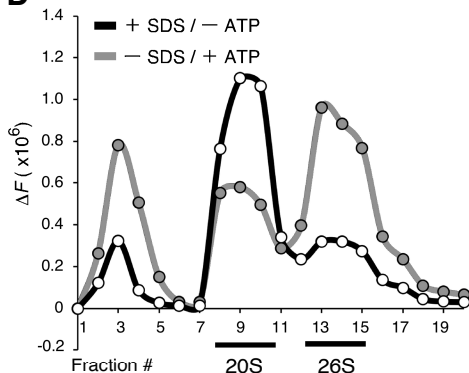

**E**

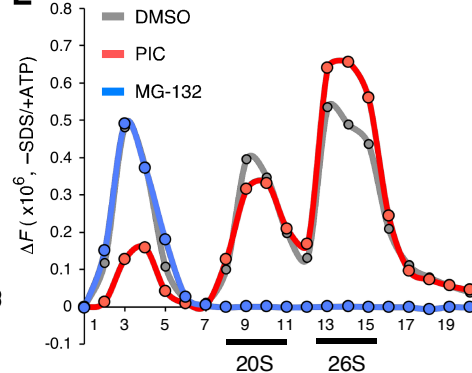

**F**

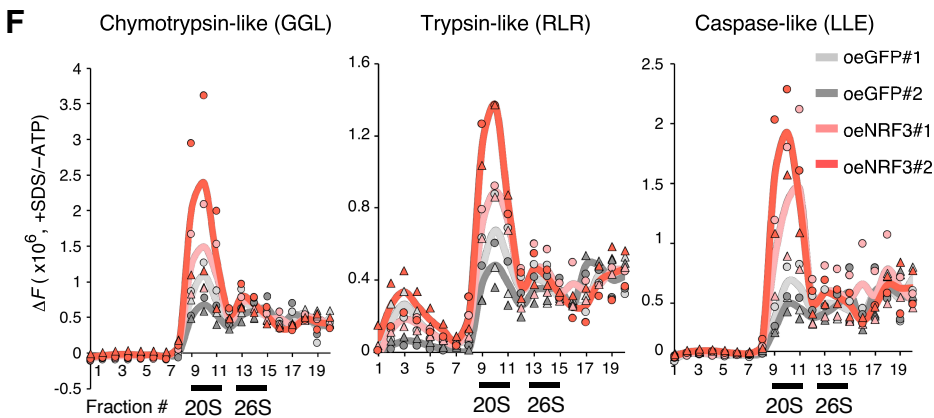

**G**

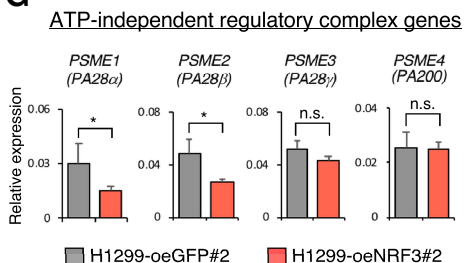

**H**

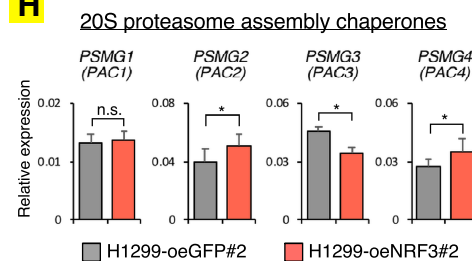

# Waku et al., Revised Supplementary Figure 3

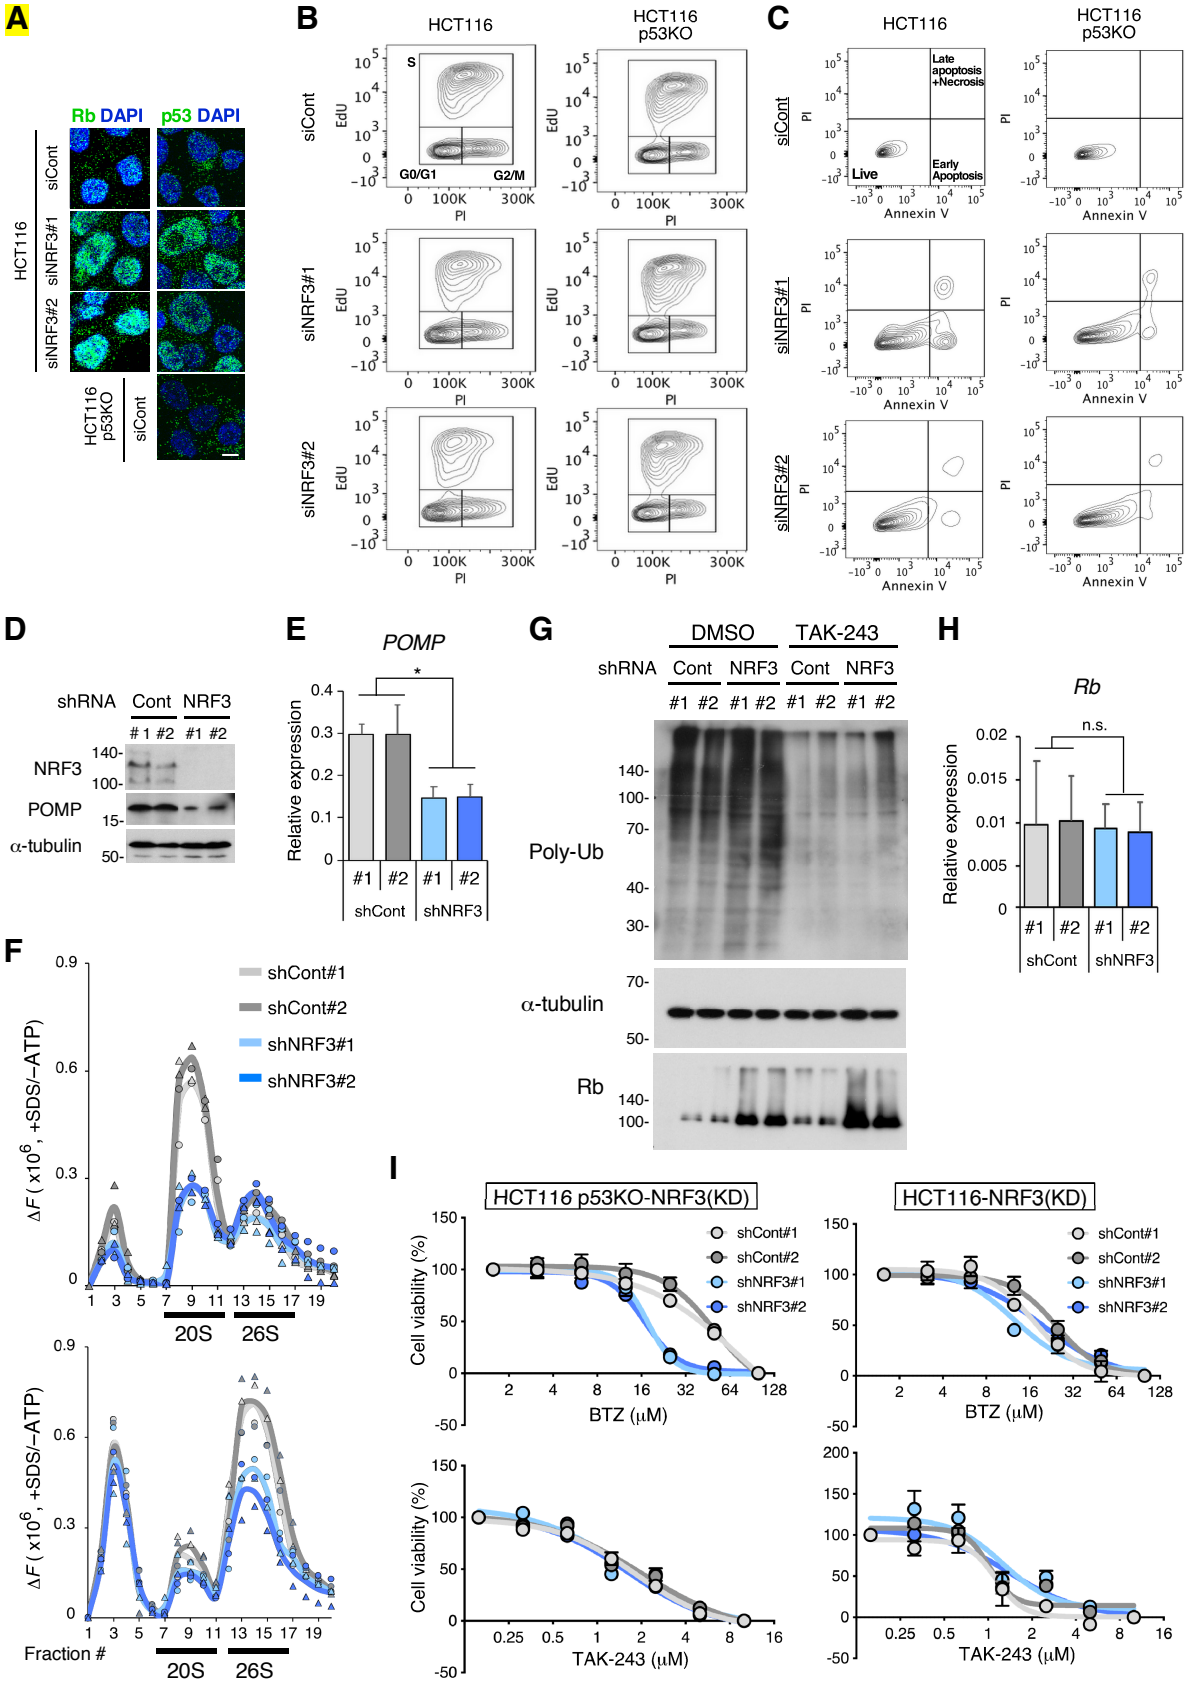

**Revised Supplementary Table 1. Abbreviations of cancer types and the numbers of specimens analyzed**

| <b>Abbreviation</b> | <b>Cancer types</b>                                              | <b>Numbers of specimens<br/>(Tumor / Normal)</b> |
|---------------------|------------------------------------------------------------------|--------------------------------------------------|
| ACC                 | Adrenocortical carcinoma                                         | 77 / 128                                         |
| BLCA                | Bladder Urothelial Carcinoma                                     | 404 / 28                                         |
| BRCA                | Breast invasive carcinoma                                        | 1085 / 291                                       |
| CESC                | Cervical squamous cell carcinoma and endocervical adenocarcinoma | 306 / 13                                         |
| CHOL                | Cholangio carcinoma                                              | 36 / 9                                           |
| COAD                | Colon adenocarcinoma                                             | 275 / 349                                        |
| DLBC                | Lymphoid Neoplasm Diffuse Large B-cell Lymphoma                  | 47 / 337                                         |
| ESCA                | Esophageal carcinoma                                             | 182 / 286                                        |
| GBM                 | Glioblastoma multiforme                                          | 163 / 207                                        |
| HNSC                | Head and Neck squamous cell carcinoma                            | 519 / 44                                         |
| KICH                | Kidney Chromophobe                                               | 66 / 53                                          |
| KIRC                | Kidney renal clear cell carcinoma                                | 523 / 100                                        |
| KIRP                | Kidney renal papillary cell carcinoma                            | 286 / 60                                         |
| LAML                | Acute Myeloid Leukemia                                           | 173 / 70                                         |
| LGG                 | Brain Lower Grade Glioma                                         | 518 / 207                                        |
| LIHC                | Liver hepatocellular carcinoma                                   | 369 / 160                                        |
| LUAD                | Lung adenocarcinoma                                              | 483 / 347                                        |
| LUSC                | Lung squamous cell carcinoma                                     | 486 / 338                                        |
| OV                  | Ovarian serous cystadenocarcinoma                                | 426 / 88                                         |
| PAAD                | Pancreatic adenocarcinoma                                        | 179 / 171                                        |
| PCPG                | Pheochromocytoma and Paraganglioma                               | 182 / 3                                          |
| PRAD                | Prostate adenocarcinoma                                          | 492 / 152                                        |
| READ                | Rectal adenocarcinoma                                            | 92 / 318                                         |
| SARC                | Sarcoma                                                          | 262 / 2                                          |
| SKCM                | Skin Cutaneous Melanoma                                          | 461 / 558                                        |
| STAD                | Stomach adenocarcinoma                                           | 408 / 211                                        |
| TGCT                | Testicular Germ Cell Tumors                                      | 137 / 165                                        |
| THCA                | Thyroid carcinoma                                                | 512 / 337                                        |
| THYM                | Thymoma                                                          | 118 / 339                                        |
| UCEC                | Uterine Corpus Endometrial Carcinoma                             | 174 / 91                                         |
| UCS                 | Uterine Carcinosarcoma                                           | 57 / 78                                          |

Revised Supplementary Table 2. IC50 values with statistics in response to proteasome inhibitors

| TAK-243                    | H1299 |      |        |      |        | HCT116 |      |      |      | HCT116 |      |        |      | HCT116-p53KO |      |        |      |
|----------------------------|-------|------|--------|------|--------|--------|------|------|------|--------|------|--------|------|--------------|------|--------|------|
|                            | GFP   |      | NRF3#1 |      |        | GFP    |      | NRF3 |      | shCont |      | shNRF3 |      | shCont       |      | shNRF3 |      |
|                            | #1    | #2   | #1     | #2   | mtPOMP | #1     | #2   | #1   | #2   | #1     | #2   | #1     | #2   | #1           | #2   | #1     | #2   |
| IC50 (µM, Best-fit values) | 0.79  | 0.52 | 0.61   | 0.79 | 0.68   | 1.53   | 1.37 | 1.45 | 1.80 | 1.13   | 1.02 | 1.25   | 1.42 | 1.81         | 2.04 | 1.59   | 1.62 |
| IC50 (µM, Std. Error)      | 0.20  | 0.28 | 0.12   | 0.27 | 0.15   | 0.25   | 0.32 | 0.40 | 0.36 | 0.10   | 0.11 | 0.25   | 0.23 | 0.13         | 0.33 | 0.32   | 0.09 |
| R square (Goodness of Fit) | 0.91  | 0.91 | 0.92   | 0.97 | 0.92   | 0.94   | 0.91 | 0.93 | 0.94 | 0.93   | 0.93 | 0.85   | 0.94 | 0.99         | 0.98 | 0.95   | 1.00 |

| BTZ                        | H1299 |       |        |       |        | HCT116 |       |       |       | HCT116 |       |        |       | HCT116-p53KO |       |        |       |
|----------------------------|-------|-------|--------|-------|--------|--------|-------|-------|-------|--------|-------|--------|-------|--------------|-------|--------|-------|
|                            | GFP   |       | NRF3#1 |       |        | GFP    |       | NRF3  |       | shCont |       | shNRF3 |       | shCont       |       | shNRF3 |       |
|                            | #1    | #2    | #1     | #2    | mtPOMP | #1     | #2    | #1    | #2    | #1     | #2    | #1     | #2    | #1           | #2    | #1     | #2    |
| IC50 (µM, Best-fit values) | 11.39 | 15.01 | 34.13  | 49.49 | 12.28  | 13.82  | 13.19 | 52.61 | 53.28 | 17.48  | 24.34 | 12.49  | 19.58 | 72.52        | 49.63 | 17.65  | 16.82 |
| IC50 (µM, Std. Error)      | 2.01  | 0.44  | 2.08   | 1.36  | 0.59   | 1.41   | 0.57  | 11.47 | 6.46  | 1.36   | 1.60  | 1.11   | 1.60  | 13.29        | 5.53  | 0.61   | 0.82  |
| R square (Goodness of Fit) | 0.99  | 0.99  | 0.98   | 0.99  | 0.97   | 0.98   | 0.98  | 0.95  | 0.97  | 0.97   | 0.98  | 0.97   | 0.99  | 1.00         | 0.98  | 0.99   | 0.98  |

Revised Supplementary Table 3. Primer and oligonucleotide sequences

qPCR primer

| Target gene            | Forward primer          | Reverse primer            |
|------------------------|-------------------------|---------------------------|
| PSMA1 ( $\alpha$ 6)    | CCAGGGCAGGATTCATCA      | TCTGATTGCGCCCTTTTC        |
| PSMA2 ( $\alpha$ 2)    | GCCCCGATTACAGAGTGC      | TGGACGAACACCACCTGA        |
| PSMA3 ( $\alpha$ 7)    | TGTTGATCGGCATGTTGG      | TGGCCACTCTGTCTGCAA        |
| PSMA4 ( $\alpha$ 3)    | CATTGGCTGGGATAAGCA      | ATGCATGTGGCCTTCCAT        |
| PSMA5 ( $\alpha$ 5)    | CTTCAGAGGGTGCCAGCA      | CAGGCTGCACTGTGGCTA        |
| PSMA6 ( $\alpha$ 1)    | AACCAGGGTGGCCTTACA      | CCGGTCATCACACAACCA        |
| PSMA7 ( $\alpha$ 4)    | AGTCAGTGC GCGAGTCC      | TGCCACCTGACTGAACCA        |
| PSMB1 ( $\beta$ 6)     | CATGCTACAGCCCCTGCT      | GCATGGCTCTGTCCAAGG        |
| PSMB2 ( $\beta$ 4)     | CTTCACACGCCGAAACCT      | AGGCTGCCAGGTAGTCCA        |
| PSMB3 ( $\beta$ 3)     | TGGTGGCCAACCTCTTGT      | GGCAGCCGATGAGGTCTA        |
| PSMB4 ( $\beta$ 7)     | TCTCGGCCAGATGGTGAT      | CACATAACCGAGGAAGCT        |
| PSMB5 ( $\beta$ 5)     | CCATGGGCACCATGATCT      | GAAGGTGGCCCTGAAAT         |
| PSMB6 ( $\beta$ 1)     | CTGATGGCGGGAATCATC      | CCAATGGCAAAGGACTGC        |
| PSMB7 ( $\beta$ 2)     | CGGCTGTGTCGGTGTATG      | GCCAGTTTTCCGGACCTT        |
| PSMC1 (Rpt2)           | CATGGCCACAAACCGAAT      | ATCAGGCAGGGGGAACTC        |
| PSMC2 (Rpt1)           | TGGGATTTGGCTGCAGAT      | TTTGGTCTCCGAATCA          |
| PSMC3 (Rpt5)           | GCCCCACGGAGCAATACAG     | CATCAGCACCCCTTTTGG        |
| PSMC4 (Rpt3)           | GGAAGACCATGTTGGCAAAG    | AAGATGATGGCAGGTGCATT      |
| PSMC5 (Rpt6)           | CTCCAGGCACTGGGAAGA      | CGTGCCATGACAAACAGC        |
| PSMC6 (Rpt4)           | GGCAGATCGTGGGTGAAG      | CGACGACAACCCACAACA        |
| PSMD1 (Rpn2)           | ATGTCAGGAGGGCAGCAG      | AGCGCACATGAGGGTGT         |
| PSMD2 (Rpn1)           | CCCAAGGTGCCTGATGAC      | CTTGGCCAAAAGCTGCAT        |
| PSMD3 (Rpn3)           | GCTGTGCAGGGCTTCTTC      | GGTGTGACGACGCTTTT         |
| PSMD4 (Rpn10)          | CGGGATTGCTACGACTGG      | CAGTGCGGCCAAACTCTT        |
| PSMD6 (Rpn7)           | GGCAAAGGCCGAGTACCT      | ACCCAGGGCCACAGTTTT        |
| PSMD7 (Rpn8)           | GCTGGCAGTGCAGAAGGT      | ACCCCAAAGCACACCAA         |
| PSMD8 (Rpn12)          | CCACCCGATCCTCTTCT       | GCTGGCTGGCAAACCTGT        |
| PSMD11 (Rpn6)          | ATGCAGGGAGGCAGACAG      | GGAGCTCTGCCCGGTAAT        |
| PSMD12 (Rpn5)          | TCCAAAAGGCGGAGTCAG      | GCCTTCGGTAACCATTCCG       |
| PSMD13 (Rpn9)          | ATGCTCTGCGTTTTTGG       | CAGCACAGGGTGCATGAG        |
| PSMD14 (Rpn11)         | CCGTGCTGGAGTTCCAAT      | TGCCTCCACACTGACACC        |
| ADRM1 (Rpn13)          | CCCCTCATGTGCCAGTTC      | TTCGTGTCGCCCTCTTTTC       |
| SHFM1 (Rpn15)          | GAAAAAGCAGCCGGTAGA      | AAGCCAGCCCAGTCTTCG        |
| PSME1 (PA28 $\alpha$ ) | CATCCCAGTGCCTGATCC      | GCCACAGGGAGGACCTTT        |
| PSME2 (PA28 $\beta$ )  | CGCAAACAGGTGGAGGTC      | CCCGGAGGGAAAGTCAAGT       |
| PSME3 (PA28 $\gamma$ ) | CAGCCTTCGGCTCATCAT      | GGGGCCGTTTGATCTTCT        |
| PSME4 (PA200)          | GAAAGCACCCAGCGATGT      | GGCACAGAAGCTCCCAAA        |
| PSMG1 (PAC1)           | CCAATCCCTCGGTTTTTC      | CCTTGGACAAGAGCCAAA        |
| PSMG2 (PAC2)           | CCGGGAGGAGGTATCACA      | TGGGATGTTGTCCCTTC         |
| PSMG3 (PAC3)           | GTCCTTCTGGGGCAGGAT      | TCACCACACCTGGCACAC        |
| PSMG4 (PAC4)           | CGGACTCGCTGTTCTGT       | TGGGCAAGGCCAGTAGAG        |
| POMP (UMP1)            | AGGCAGTGCAGCAGGTTT      | GGCTCTCCCATGACTTCG        |
| NRF3                   | CTGACTGGGAGGCAGAAAAG    | TCAGGCTGTGATGAAAGCAA      |
| p53                    | GCCCAACAACACCAGCTCCT    | CCTGGGCATCCTTGAGTTCC      |
| Retinoblastoma         | AGGCCCCCTACCTTGTCAT     | TGTTGGTGTGGCAGAC          |
| p21                    | GGAGACTCTCAGGGTCGAAA    | TTAGGGTCTCCTTTGGAGA       |
| PUMA                   | GGGCCAGACTGTGAATCCT     | ACGTGCTCTCTAAACCTATGCA    |
| $\beta$ -actin         | CCAACCGCGAGAAGAT        | CCAGAGGCGTACAGGG          |
| HPRT                   | TTCTTGGTCAGGCAGTATAATCC | AGTCTGGCTTATATCCAACACTTCG |

Revised Supplementary Table 3. *Continued*

**ChIP primer**

| Traget region       | Forward primer        | Reverse primer       |
|---------------------|-----------------------|----------------------|
| p21-p53RE           | GTGGCTCTGATTGGCTTTCTG | CTGAAAACAGGCAGCCCAAG |
| PUMA-p53RE          | GCGAGACTGTGGCCTTGTGT  | CGTTCCAGGGTCCACAAAGT |
| POMP-ARE            | CCTCGGAAACGGAAGTGA    | ACCATCTCCGCAGCTCT    |
| POMP-negative locus | GGGCTTTTTGGCCTCTGT    | TGGTTGCCACAAAGTCTCT  |

**siRNA**

| Target gene | Sense                 | Antisense             |
|-------------|-----------------------|-----------------------|
| siControl   | UUCUCCGAACGUGUCACGUTT | ACGUGACACGUUCGGAAATT  |
| siNRF3 #1   | GGAUCAAAGUGAUUCUGAUTT | AUCAGAAUCACUUUGAUCCAA |
| siNRF3 #2   | GCAAAGAAGGAAACUCUUATT | UAAGAGUUUCCUUCUUUGCUU |

**shRNA\***

| Target gene | Upper                                                                    | Lower                                                                      |
|-------------|--------------------------------------------------------------------------|----------------------------------------------------------------------------|
| shControl   | TCGAGGTTCTCCGAACGTGTACGTT<br>TCAAGAGAACGTGACACGTTCCGAGA<br>ATTTTTACGCGTA | AGCTTACGCGTAAAAAATTCTCCGAA<br>CGTGTACGTTCTCTTGAAACGTGAC<br>ACGTTCCGAGAACC  |
| shNRF3 #1   | TCGAGGGGATCAAAGTATTCTGATT<br>CAAGAGAATCAGAATCACTTTGATCC<br>TTTTTTACGCGTA | AGCTTACGCGTAAAAAAGGATCAAAG<br>TGATTCTGATTCTCTTGAAATCAGAAT<br>CACTTTGATCCCC |
| shNRF3 #2   | TCGAGGGCAAAGAAGGAACTCTTAT<br>TCAAGAGATAAGAGTTTCTTCTTTGC<br>TTTTTTACGCGTA | AGCTTACGCGTAAAAAAGCAAAGAAG<br>GAAACTTATCTCTTGAATAAGAGTT<br>TCCTTCTTTGCC    |

\*These shRNAs have the identical target sequences with siRNAs.

**guide RNA**

| Name          | Upper                     | Lower                    |
|---------------|---------------------------|--------------------------|
| POMP-ARE-gRNA | CACCGTCGGAAACGGAAGTGAGCGG | AAACCCGCTCACTTCGTTTCCGAC |

**DNA sequence primer**

| Name                     | Forward             | Reverse              |
|--------------------------|---------------------|----------------------|
| ChIP region#1 (non-ARE)  | TTCTCCTGCTCCCAACAAC | CAGCCTAGGTGACACAGCAA |
| ChIP region#2 (POMP-ARE) | CCTCGGAAACGGAAGTGA  | ACCATCTCCGCAGCTCT    |
